STUDY PROTOCOL

# Protocol for a scoping review investigating success in research capacity building for nurses, midwives and allied health professionals

Colin Hamilton<sup>1,2\*</sup>, Alexandra Malyon<sup>1</sup>, Natalie Pike<sup>1</sup>, Lok Yiu Wong<sup>1</sup>, Kieran Lock<sup>1</sup>, Emma Jones<sup>1</sup>, Gabrielle Deora<sup>1</sup>, Graham Martin<sup>2</sup>, Joanne McPeake<sup>2</sup>

**1** Cambridge University Hospitals NHS Foundation Trust, Cambridge, United Kingdom, **2** University of Cambridge, Cambridge, United Kingdom

\* [ch367@cam.ac.uk](mailto:ch367@cam.ac.uk)

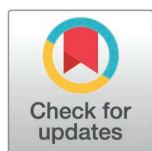

## Abstract

### Objective

To identify and describe how success is currently conceptualised in research capacity building in nurses, midwives and allied health professionals in the UK.

### Introduction

Having a research active healthcare workforce is associated with improved patient outcomes as well as staff retention. It is therefore seen as a key target for many healthcare organisations. Nurses, Midwives and Allied Health Professionals form the largest group of healthcare professionals but are traditionally less involved in research than medically trained staff. A variety of schemes have aimed to address this through so called “research capacity building” activities but an understanding of what constitutes success is needed to aid development of future interventions.

### Inclusion criteria

Participants - Any or all of Nurses, Midwives or Allied Health Professionals.  
Concept- Definition of success or description of aims of activities aimed at research capacity building.  
Context- Within in the UK.

### Methods

Content from peer reviewed journals will be searched for in: Embase, CINAHL, MED-LINE, AMED, BNI and EMCARE Web of Science Core Collection.  
Grey Literature will be searched for in Google and Overton as well as key websites of organisations that work in developing research capacity. Website searches will include National Institute for Health and Care Research, all charities that form the

## OPEN ACCESS

**Citation:** Hamilton C, Malyon A, Pike N, Wong LY, Lock K, Jones E, et al. (2025) Protocol for a scoping review investigating success in research capacity building for nurses, midwives and allied health professionals. PLoS One 20(8): e0329264. <https://doi.org/10.1371/journal.pone.0329264>

**Editor:** LS Katrina Li, La Trobe University - Bundoora Campus: La Trobe University, AUSTRALIA

**Received:** May 6, 2025

**Accepted:** July 14, 2025

**Published:** August 1, 2025

**Copyright:** © 2025 Hamilton et al. This is an open access article distributed under the terms of the [Creative Commons Attribution License](https://creativecommons.org/licenses/by/4.0/), which permits unrestricted use, distribution, and reproduction in any medium, provided the original author and source are credited.

**Data availability statement:** No datasets were generated or analysed during the current study. All relevant data from this study will be made available upon study completion.

**Funding:** There is no specific funding to declare for this project. JM and GM is based in The Healthcare Improvement Studies Institute (THIS Institute), University of Cambridge. THIS Institute is supported by the Health Foundation, an independent charity committed to bringing about better health and healthcare for people in the UK. CH, AM, NP, LYW, KL, EJ and GD are employed by Cambridge University Hospitals NHS Foundation Trust. The Health Foundation and Cambridge University Hospitals NHS Foundation Trust has had no role in study design and will have no role in data collection and analysis, decision to publish, or preparation of the manuscript.

**Competing interests:** The authors have declared that no competing interests exist.

Association of Medical Research Charities as of search date and the websites for the recognised professional bodies for Nurses, Midwives and Allied Health Professionals. Screening of titles and abstracts then full text will be undertaken by one person with 20% cross checked by a second reviewer. Data extraction will use a bespoke data extraction tool and will be undertaken by one person, with 20% cross checked with a second reviewer. A narrative synthesis and qualitative content analysis will be used to synthesise the data.

## Registered

OSF Registries: <https://doi.org/10.17605/OSF.IO/QVCDX>

## Introduction

Being a research-active organisation has been associated with improved patient outcomes [1] and staff retention [2] as well as facilitating clinical developments [3]. In the UK, clinical research is seen as a key element of the economy [4] as well as a way of managing challenges associated with aging populations amongst other issues [3]. Engagement in research is therefore seen as a key goal for staff in the National Health Service (NHS) [5]. There are significant barriers and challenges to engagement in research, which include a lack of time, resources, knowledge, skills, and coordination [6].

Nurses, Midwives and Allied Health Professionals (NMAHPs) form the majority of the patient-facing workforce in the NHS; however their engagement in research activities is low in comparison with medically trained staff [7]. To address this many organisations have instigated the use of so-called “research capacity building” (RCB) exercises [8]. These activities often aim to address the known barriers and range from resources, webinars, or single-day courses, to fellowships and career paths [9]. Significant time and money are invested in these activities which aim to produce outputs in the form of publications, further fellowships and active researchers [10]. What constitutes “best practice” in research capacity building, however, is yet to be defined, and the evidence base is embryonic [8].

Part of the challenge seen is the lack of clarity on what constitutes success. Cooke et al [8] describe the aim of such activities as “doing more research, better”. However, this only appears to cover a small aspect of RCB and it does not provide a measure of what “doing more research” or what “better” is. When looking at something as complex as RCB the opinions of various stakeholders, including providers of RCB activities, funders, NMAHP consumers of these activities and healthcare managers, need to be considered, as their opinions on what success is are likely to vary depending on their own priorities.

An understanding of the range of criteria for success in RCB activities among the breadth of stakeholder groups is therefore required. While some clarity is likely to be produced in the published academic literature this is likely only a part of the picture and is limited in scope. As the RCB landscape is fragmented, with multiple funders

and stakeholders, the grey literature is likely to be a significant source of understanding. The nebulous nature of RCB activities also calls for a flexible approach to understanding the current knowledge base.

Scoping reviews are advocated when attempting to clarify nebulous or multifaceted concepts of this kind [11]. Scoping reviews do not attempt to appraise evidence or to provide any sort of hierarchy, which is appropriate when dealing with a concept like success in RCB where differing understandings can be equally valid. By building search strategies around population, concept and context, and reviewing a wide variety of literature sources, an overall understanding of the key elements can be built [11].

This project will undertake a scoping review to answer the question “How is success currently conceptualised in research capacity building in nurses, midwives and allied health professionals in the UK?”. A preliminary search of MEDLINE, the Cochrane Database of Systematic Reviews and Prospero was conducted and has identified no current systematic reviews or scoping reviews on this topic.

## Review aim

To identify and describe how success is currently conceptualised in research capacity building in nurses, midwives and allied health professionals in the UK.

## Methods

The proposed scoping review will be conducted in accordance with the Joanna Briggs Institute (JBI) methodology for scoping reviews [12]. It will use the framework described by Arksey and O'Malley, with the 5 stages illustrated below [13].

### Framework stage 1: Identifying the research question

To address the stated aim of the review, the following research question has been identified.

How is success currently conceptualised in research capacity building in nurses, midwives and allied health professionals in the UK?

### Framework stage 2: Identifying relevant studies

The search strategy will aim to identify both published and unpublished articles. A three-step search strategy will be utilized in this review. First, a limited initial search of MEDLINE (PubMed) and CINAHL (EBSCO) has been undertaken which identified 3 key papers [8,9,14]. Key words in titles and abstracts as well as index terms and review search terms were used to develop a search strategy. Search strategies, where available, were screened for further terms. This search strategy was adapted for each database or information source and checked by a librarian. After implementing this search strategy as outlined, reference lists of included articles will be reviewed for possible further appropriate papers.

A full search strategy for sources can be found in [S1 Appendix](#).

## Information sources will include

**Published literature.** Through OVID: Embase, MEDLINE. Through EBSCO: CINAHL, EMCARE, BNI, Web of Science Core Collection.

**Grey literature.** Google (first 100 results of search) and Overton.

**Stakeholder documents and websites.** National Institute for Health and Care Research (NIHR)

All charities that form the Association of Medical Research Charities as of search date.

The websites for the recognised professional bodies for Nurses, Midwives and AHPs.

## Inclusion criteria

The inclusion criteria follow the “Participant”, “Concept”, “Context” and “Type of evidence sources” framework described in the JBI methodology [12]. This is summarised in [Table 1](#).

## Participants

Populations described should include one or all of Nurses, Midwives and the 14 Allied Health Professions as described by the NHS in the UK. These are: Art therapists, dietitians, drama therapists, music therapists, occupational therapists, operating department practitioners, orthoptists, osteopaths, paramedics, physiotherapists, podiatrists, prosthetists and orthotists, radiographers, and speech and language therapists.

## Concept

Research capacity building or development covers a broad range of activities at the individual and organisational level [16]. A generally accepted definition is that described by Trostle, of “a process of individual and institutional development which leads to higher levels of skills and greater ability to perform useful research”(13 p1321). Activities can include education, funding, advocacy and development of policy amongst others. In this context, we will explore definitions of success or stated aims of activities which:

- Conform to Trostle’s definition given above
- Are described as research capacity building or development or similar

## Context

The RCB landscape within the UK is unique but shares concepts with other countries. For literature in peer-reviewed journals any healthcare context in the UK will be included. Concept papers or reviews may not state the context and will therefore be included if they do not exclude the UK. Grey literature which does not aim to be universally generalisable, including documents such as funders’ reports will be included if they relate to the UK. There will be no restriction on time since publication as there is no obvious cut-off to make.

## Types of evidence sources

This scoping review will consider articles published in peer-reviewed journals of any sort, including, but not limited to, conference abstracts, reviews, opinion pieces or primary research. It will also incorporate grey literature including funders’ reports, professional bodies and policy documents.

## Framework stage 3: Study selection

Following the search, all identified information sources will be collated and uploaded into the Rayyan review management software ([www.rayyan.ai](http://www.rayyan.ai)) and duplicates removed by reviewers. Titles and abstracts will then be screened by one reviewer with an independent reviewer checking a random 20% sample for assessment against the inclusion criteria. Any

**Table 1. Table illustrating inclusion criteria.**

|                                 |                                                                                         |
|---------------------------------|-----------------------------------------------------------------------------------------|
| <b>Participants</b>             | <b>Nurses, Midwives, or the 14 AHPs as described by the NHS.</b>                        |
| <b>Concept</b>                  | Self-described as research capacity building or conforming to Trostle’s definition [15] |
| <b>Context</b>                  | In the UK                                                                               |
| <b>Type of evidence sources</b> | Articles published in peer-reviewed journals and grey literature                        |

<https://doi.org/10.1371/journal.pone.0329264.t001>

disagreements that arise between the reviewers will be resolved through discussion; if no resolution is possible then a third reviewer will arbitrate. Numbers of disagreements will be recorded, and a Kappa statistic will be calculated. If this score is less than 0.61 indicating less than a substantial agreement [17], then secondary reviewers will check all articles.

The full text of selected items will be assessed against the inclusion criteria by one reviewer with a random 20% checked by a second independent reviewer. Reasons for exclusion will be recorded. Any disagreements that arise between the reviewers will be resolved through discussion; if no resolution is possible then a third reviewer will arbitrate. Numbers of disagreements will be recorded and a Kappa statistic will be calculated. If this score is less than 0.61 indicating less than a substantial agreement [17], then secondary reviewers will check all articles. The results of the search and the study inclusion process will be reported and presented in a PRISMA flow diagram [S1 Checklist](#).

#### Framework stage 4: Charting the data

Data will be extracted from included papers by one reviewer using a bespoke data extraction tool ([S2 Appendix](#)) developed for this review. A random 20% of entries will be checked by a second reviewer. The data extracted will include: title; year of publication; participants; context; study methods (if appropriate); author or publishing body (if appropriate); and description of aims or success.

The draft data extraction form was piloted on two papers that were found in the initial limited search. The data extraction tool may be modified during the review if needed from each included source. Modifications will be recorded and reported. Authors will be contacted for missing information or clarification if appropriate.

#### Framework stage 5: Collating, summarizing and reporting the results

In the first instance data will be presented in tabular form with key elements of each included paper shown. This will include (but not be limited to) author, date, type of paper (journal article, policy document, conference abstract etc), population and aim/description of success. A narrative summary will be produced to discuss the results and link them to the review objective.

It is presumed that aims of programmes or descriptions of success will have commonalities. If this is apparent then an inductive qualitative content analysis will be undertaken to understand any commonalities [18]. Two authors will gain deep familiarity with the data by reading and re-reading sources, then perform open coding. Following this, the two reviewers will meet to build a coding framework. Data will be extracted and organised using this framework. The coding framework will be revised, as necessary, to develop over-arching categories that address the review question and objectives. There are no planned subgroup analyses.

The final article will be published in a peer-reviewed journal. A written report will also be made available to the organisations identified in the grey literature search, including: The NIHR, all charities that form the Association of Medical Research Charities and the recognised professional bodies for Nurses, Midwives and AHPs.

#### Strengths and limitations of this study

- A wide range of information sources will be reviewed.
- A comprehensive search strategy has been developed in coordination with an experienced librarian.
- The project will focus on the UK; consequently, applicability to other contexts will be limited.

#### Supporting information

**S1 Appendix. Search strategy.**  
(DOCX)

## S2 Appendix. Data extraction instrument.

(DOCX)

## S1 Checklist. PRISMA-P-SystRev-checklist.

(DOCX)

## Ethics approval

Ethical approval has not been sought for the present study because it is a review of the published academic and grey literature. The National Health Services, Health Regulatory Approval Tool <https://hra-decisiontools.org.uk/ethics/> has been used to confirm that ethical approval is not required.

## Patient and public involvement statement

No patient or public involvement will be part of this project.

## Acknowledgments

This review will form part of a PhD for CH.

## Author contributions

**Conceptualization:** Colin Hamilton, Natalie Pike, Lok Yiu Wong, Kieran Lock, Emma Jones, Gabrielle Deora, Graham Martin, Joanne McPeake.

**Methodology:** Colin Hamilton, Graham Martin, Joanne McPeake.

**Project administration:** Colin Hamilton, Alexandra Malyon, Natalie Pike, Lok Yiu Wong, Kieran Lock, Emma Jones, Gabrielle Deora.

**Supervision:** Graham Martin, Joanne McPeake.

**Writing – original draft:** Colin Hamilton, Alexandra Malyon.

**Writing – review & editing:** Colin Hamilton, Alexandra Malyon, Natalie Pike, Lok Yiu Wong, Kieran Lock, Emma Jones, Gabrielle Deora, Graham Martin, Joanne McPeake.

## References

1. Clarke M, Loudon K. Effects on patients of their healthcare practitioner's or institution's participation in clinical trials: a systematic review. *Trials*. 2011;12:16.
2. Aarons GA, Sommerfeld DH, Hecht DB, Silovsky JF, Chaffin MJ. The impact of evidence-based practice implementation and fidelity monitoring on staff turnover: evidence for a protective effect. *J Consult Clin Psychol*. 2009;77(2):270–80. <https://doi.org/10.1037/a0013223> PMID: [19309186](https://pubmed.ncbi.nlm.nih.gov/19309186/)
3. Institute of Medicine U. Evidence-based medicine and the changing nature of healthcare: 2007 IOM annual meeting summary. Washington (DC): National Academies Press; 2008. <https://www.ncbi.nlm.nih.gov/books/NBK52822/>
4. Grant J, Buxton MJ. Economic returns to medical research funding. *BMJ Open*. 2018;8(9):e022131. <https://doi.org/10.1136/bmjopen-2018-022131> PMID: [30201795](https://pubmed.ncbi.nlm.nih.gov/30201795/)
5. NHS England. Chief nursing officer for England's strategic plan for research. NHS England; 2021. <https://www.england.nhs.uk/wp-content/uploads/2021/11/B0880-cno-for-englands-strategic-plan-fo-research.pdf>
6. Pager S, Holden L, Golenko X. Motivators, enablers, and barriers to building allied health research capacity. *J Multidiscip Healthc*. 2012;5:53–9.
7. National Institute for Health and Care Research. Extra £30 m a year to boost research careers for healthcare professionals. 2023 [Accessed 2024 July 16]. <https://www.nihr.ac.uk/news/extra-30m-a-year-to-boost-research-careers-for-healthcare-professionals/34213>
8. Cooke J, Gardois P, Booth A. Uncovering the mechanisms of research capacity development in health and social care: a realist synthesis. *Health Res Policy Syst*. 2018;16(1):93. <https://doi.org/10.1186/s12961-018-0363-4> PMID: [30241484](https://pubmed.ncbi.nlm.nih.gov/30241484/)

9. Matus J, Walker A, Mickan S. Research capacity building frameworks for allied health professionals - a systematic review. *BMC Health Serv Res*. 2018;18(1):716. <https://doi.org/10.1186/s12913-018-3518-7> PMID: [30219065](#)
10. Sarre G, Cooke J. Developing indicators for measuring Research Capacity Development in primary care organizations: a consensus approach using a nominal group technique. *Health Soc Care Community*. 2009;17(3):244–53. <https://doi.org/10.1111/j.1365-2524.2008.00821.x> PMID: [19040697](#)
11. Munn Z, Peters MDJ, Stern C, Tufanaru C, McArthur A, Aromataris E. Systematic review or scoping review? Guidance for authors when choosing between a systematic or scoping review approach. *BMC Med Res Methodol*. 2018;18(1):143. <https://doi.org/10.1186/s12874-018-0611-x> PMID: [30453902](#)
12. Aromataris E, Lockwood C, Porritt K, Pilla B, Jordan Z. JBI manual for evidence synthesis. JBI; 2024. <https://jbi-global-wiki.refined.site/space/MANUAL>
13. Arksey H, O'Malley L. Scoping studies: towards a methodological framework. *Int J Soc Res Methodol*. 2005;8(1):19–32.
14. Booth A, Nancarrow S, Wilkinson A. Re:Cap - identifying the evidence-base for Research Capacity development in health and social care: a scoping review of the literature. 2006.
15. Trostle J. Research capacity building in international health: definitions, evaluations and strategies for success. *Soc Sci Med*. 1992;35(11).
16. Cooke J. A framework to evaluate research capacity building in health care. *BMC Fam Pract*. 2005;6:44.
17. Landis JR, Koch GG. The measurement of observer agreement for categorical data. *Biometrics*. 1977;33(1):159–74.
18. Pollock D, Peters MDJ, Khalil H, McInerney P, Alexander L, Tricco AC, et al. Recommendations for the extraction, analysis, and presentation of results in scoping reviews. *JBI Evid Synth*. 2023;21(3):520–32. <https://doi.org/10.11124/JBIES-22-00123> PMID: [36081365](#)
